# Supplementary material for: Construction of cytokine reservoirs based on sulfated chitosan hydrogels for the capturing of VEGF in situ
Source: Royal Society of Chemistry journal article supplement (doi:10.1039/c8tb02895h), 2019-01-01
Supplement: c8tb02895h1.pdf [file c8tb02895h1.pdf]

Electronic Supplementary Information

## Construct cytokine reservoirs based on sulfated chitosan hydrogels for the capturing of VEGF *in situ*

Chenmin Wang,<sup>a,b</sup> Yuanman Yu,<sup>a,b</sup> Han Chen,<sup>a,b</sup> Shuang Zhang,<sup>a,b</sup> Jing Wang<sup>\*a,b</sup> and Changsheng Liu<sup>\*b,c</sup>

a. The State Key Laboratory of Bioreactor Engineering, East China University of Science and Technology, Shanghai, 200237 People's Republic of China

b. Engineering Research Center for Biomedical Materials of Ministry of Education, East China University of Science and Technology, Shanghai, 200237, People's Republic of China

c. Key Laboratory for Ultrafine Materials of Ministry of Education, East China University of Science and Technology, Shanghai, 200237, People's Republic of China

E-mail: biomatwj@163.com, liucs@ecust.edu.cn; Tel: +86-21-64251308

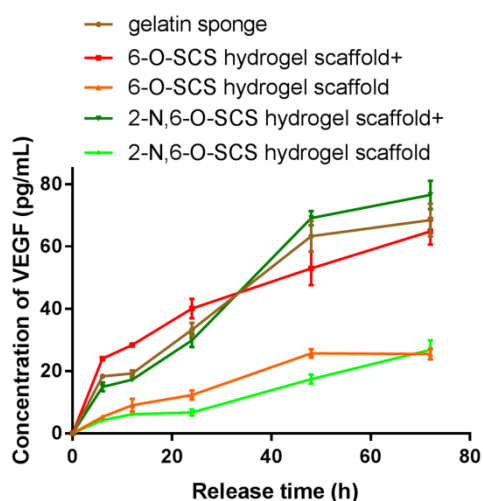

**Fig. S1** Captured-VEGF released from five kinds of scaffolds *in vitro*. The VEGF's concentration in buffer solution increasing as the release time went on.

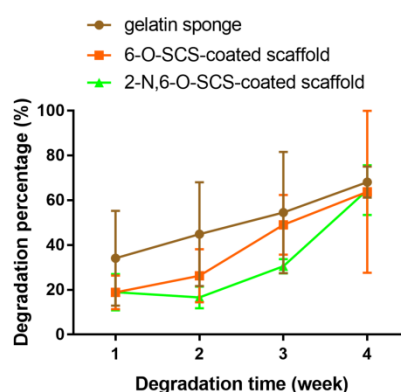

**Fig. S2** The degradation percentage of five kinds of scaffolds *in vivo*.
